# Supplementary material for: Aerogel materials with periodic structures imprinted with cellulose nanocrystals
Source: Royal Society of Chemistry journal article supplement (doi:10.1039/c7nr07719j), 2018-01-01
Supplement: c7nr07719j1.pdf [file c7nr07719j1.pdf]

Supporting Information

**Aerogel Materials with Periodic Structures Imprinted with Cellulose Nanocrystals**

**Yi-Tao Xu,<sup>a</sup> Yiling Dai,<sup>a</sup> Thanh-Dinh Nguyen,<sup>a</sup> Wadood Y. Hamad,<sup>b</sup> and Mark J. MacLachlan<sup>a,\*</sup>**

<sup>a</sup>Department of Chemistry, University of British Columbia, 2036 Main Mall, Vancouver, British Columbia, V6T 1Z1, Canada.

<sup>b</sup>FPIinnovations, 2665 East Mall, Vancouver, British Columbia, V6T 1Z4, Canada.

\*Email: [mmaclach@chem.ubc.ca](mailto:mmaclach@chem.ubc.ca)

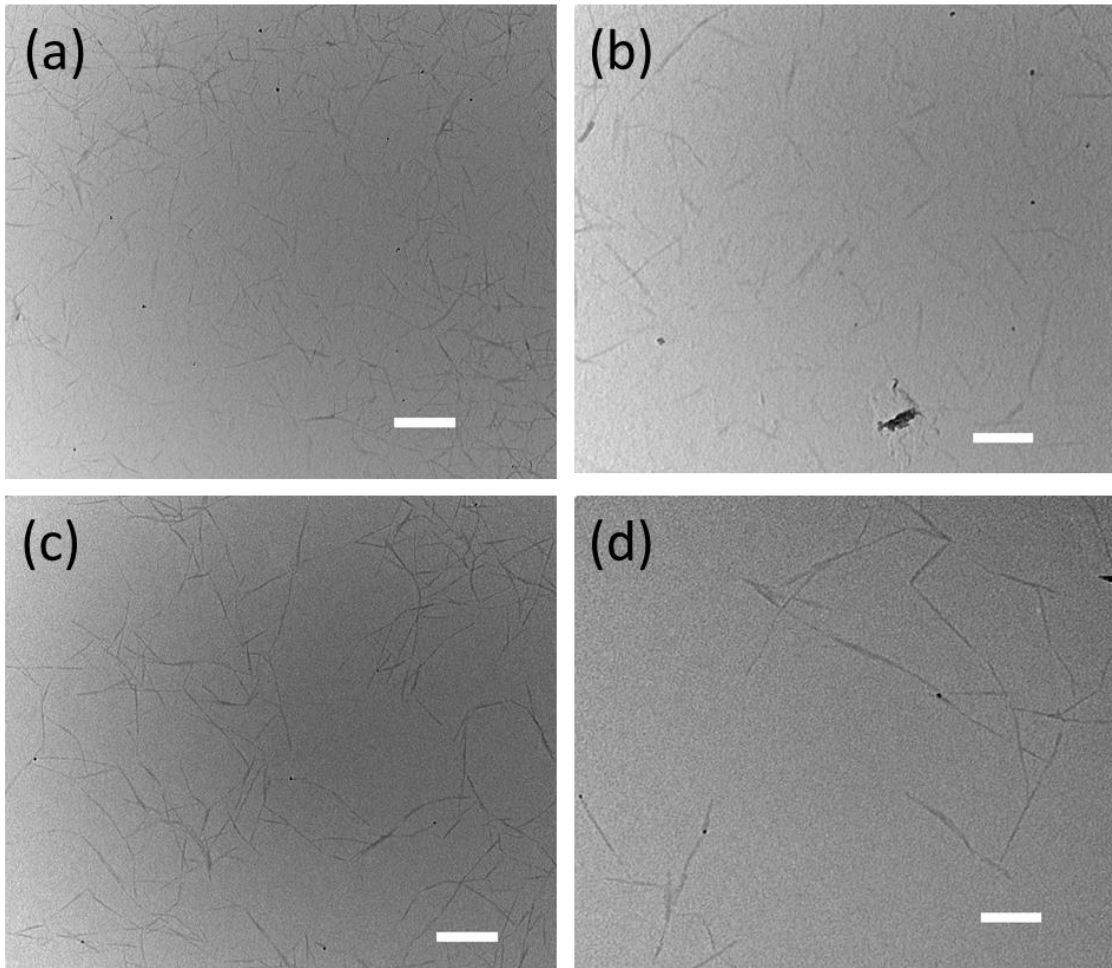

**Fig. S1** TEM image of cellulose nanocrystals (CNC-H) from (a and b) upper phase CNC suspension; (c and d) lower phase CNC suspension. (scale bars: 400 nm for a and c; 200 nm for b and d)

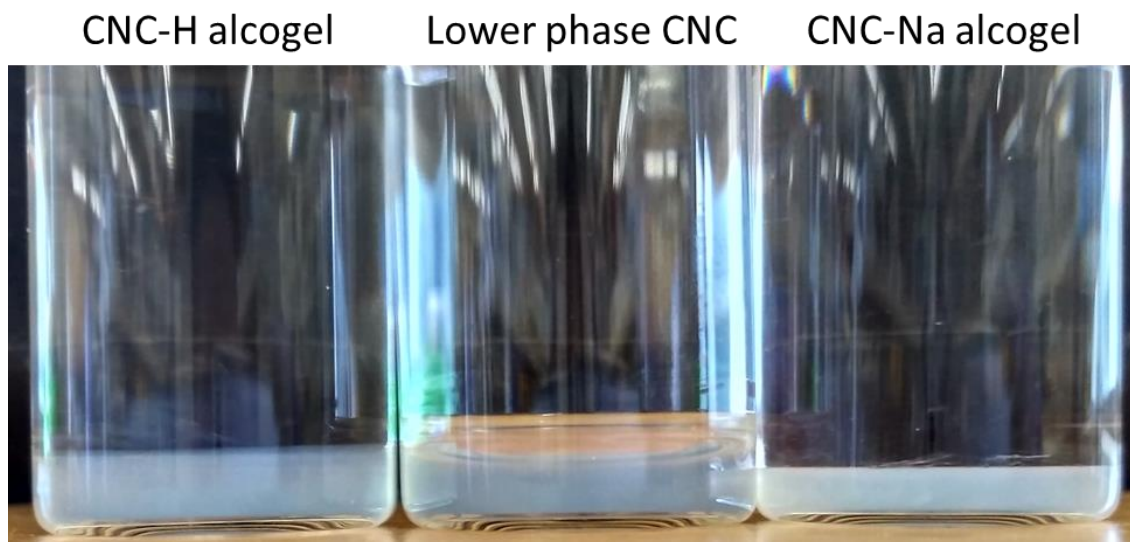

**Fig. S2** Digital image of a CNC alcogel and the corresponding CNC suspension (2 mL). The CNC-Na alcogel displays larger shrinkage than CNC-H.

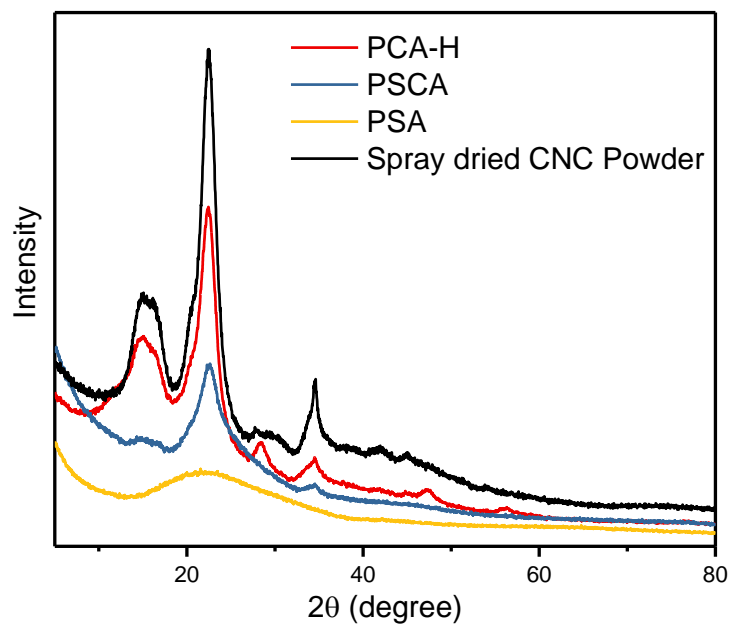

**Fig. S3** Powder X-ray diffraction (PXRD) patterns of cellulose (PCA-H), cellulose/silica (PSCA-50), silica (PSA-50) aerogels and the commercial spray dried CNC powders. PXRD patterns of PCA-H, spray dried CNC powders and PSCA-50 display two peaks characteristic of crystalline cellulose around  $2\theta \approx 15.2^\circ$  and  $22.5^\circ$ . PXRD of PSA-50 shows only a broad peak characteristic of amorphous silica and no peaks associated with the CNCs.

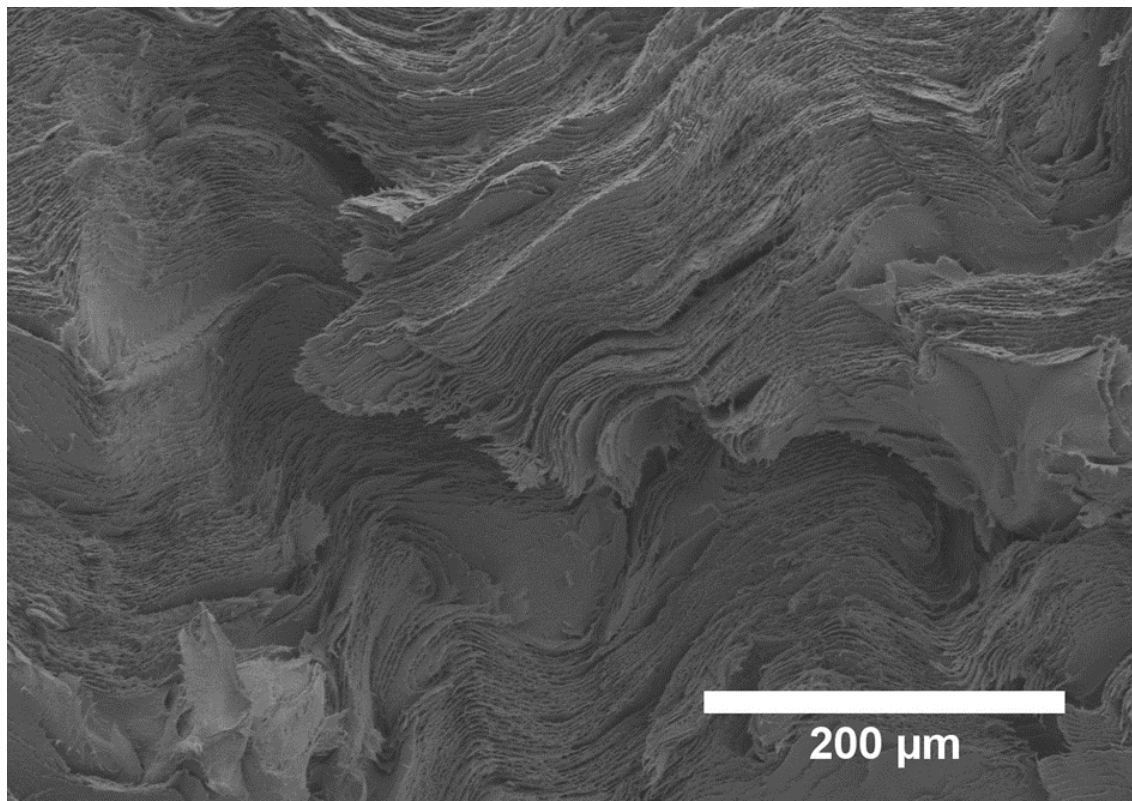

**Fig. S4** SEM image of a cross-section of **PCA-Na** shows the pervasive layered structure of the material.

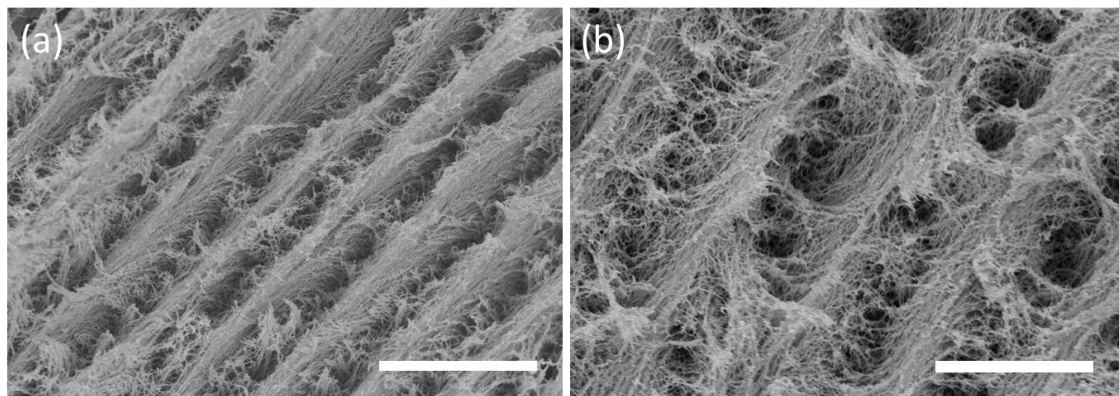

**Fig. S5** SEM images of cross sections of (a) **PCA-Na** and (b) **PCA-H**. Scale bars: 5 μm

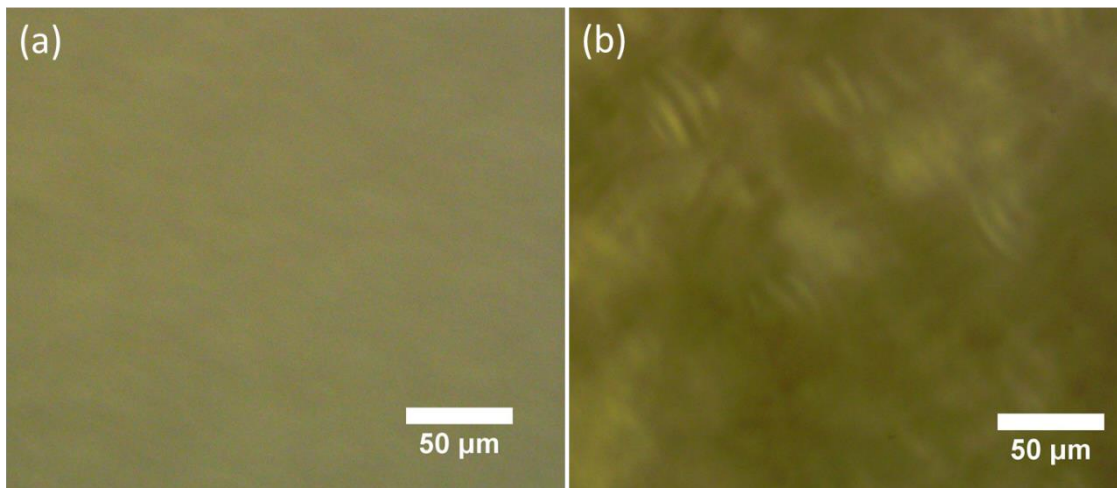

**Fig. S6.** POM image of 1.7 wt% CNC-Na suspension before (a) and after gelation (b)

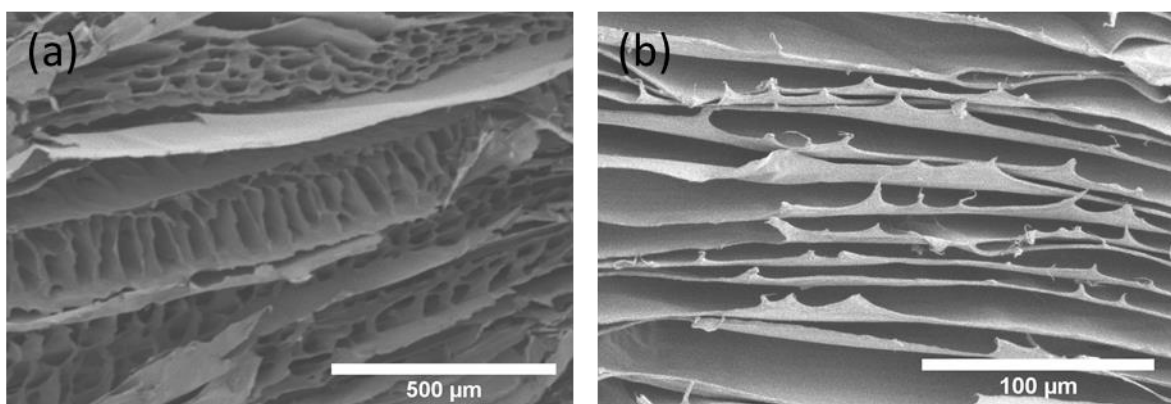

**Fig. S7** (a,b) SEM images of the cross section of a cellulose cryogel prepared from the lower phase CNCs.

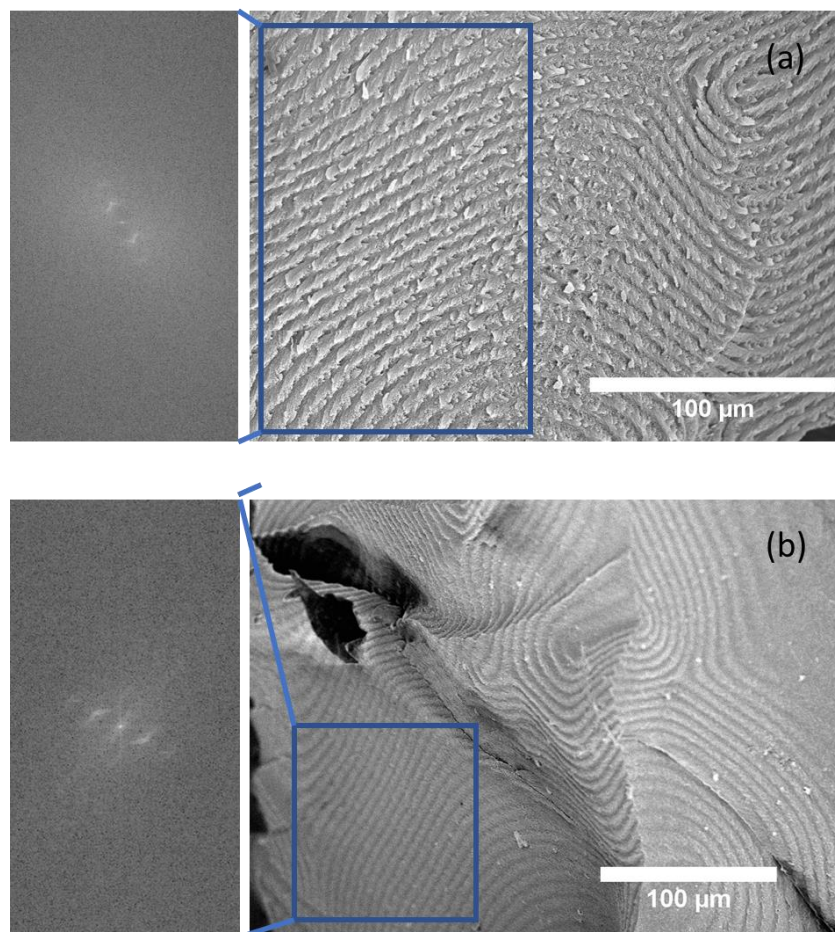

**Fig. S8** SEM image of a cross-sections of (a) PSCA-70 and (b) PSA-70, as well as their corresponding fast Fourier-transform patterns.

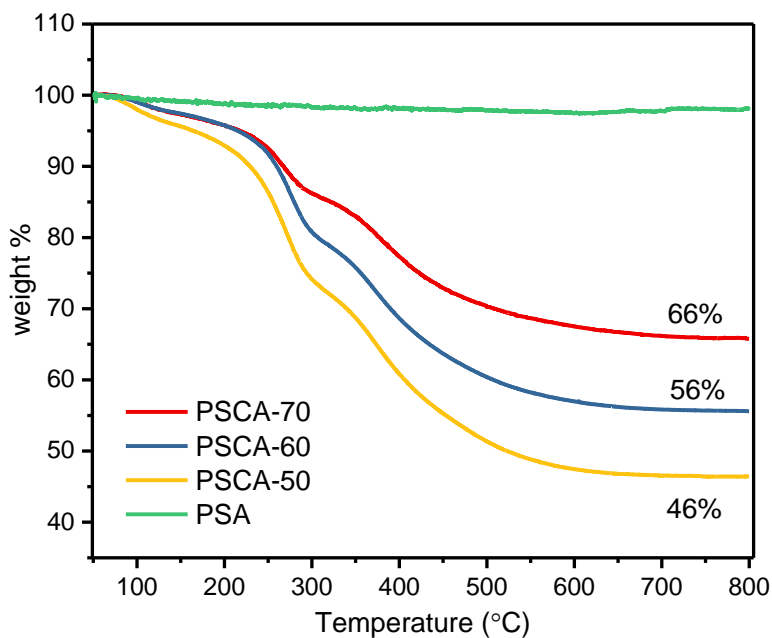

**Fig. S9** Thermogravimetric analysis (TGA, 10 °C/min heating rate, under air atmosphere) of periodic silica/cellulose aerogel (PSCA) and silica-only aerogel (PSA) under air. From the TGA, the silica loading was determined to be ca. 46%, 56%, and 66% for PSCA-50, PSCA-60 and PSCA-70, respectively.

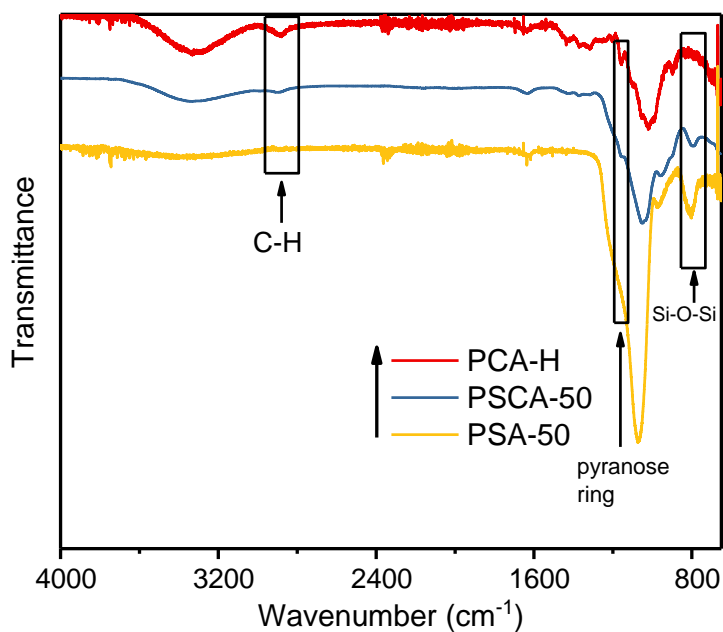

**Fig. S10** FTIR spectra for PCA-H, PSCA-50 and PSA-50 (The arrows point out the characteristic peak of CNC and silica).

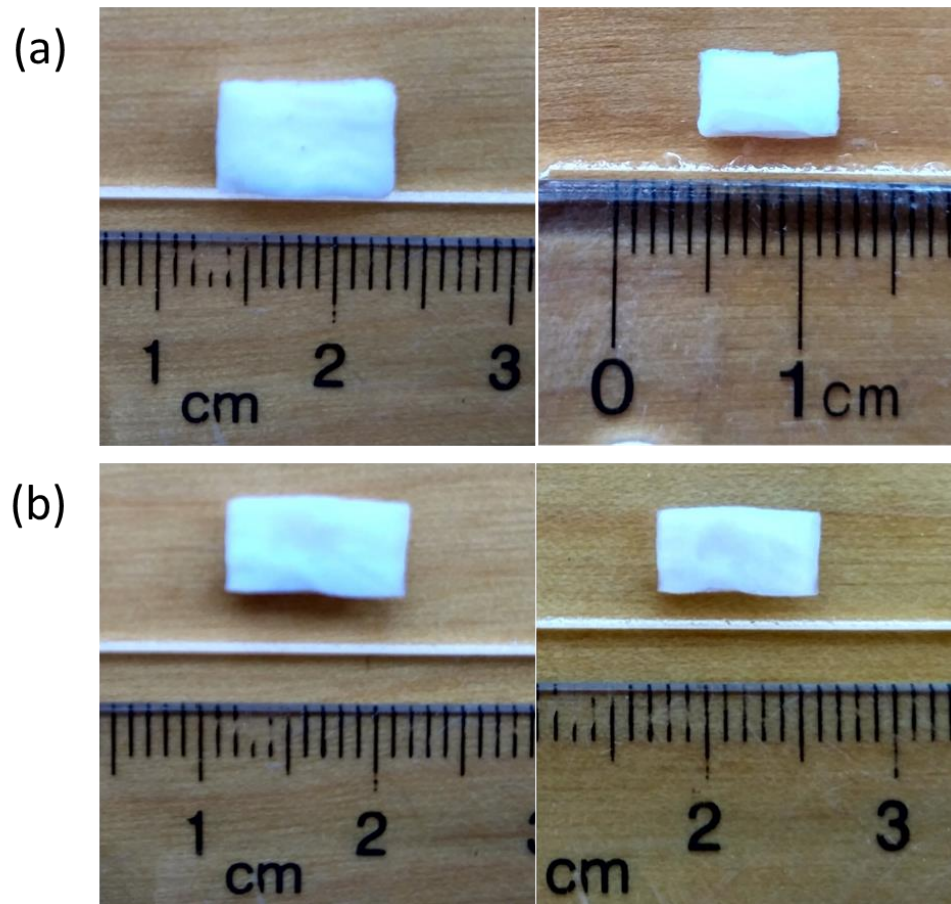

**Fig. S11** Digital images of periodic cellulose/silica aerogel before and after calcination for (a) **PCSA-50** and (b) **PCSA-60** with silica loadings of 50% and 60%, respectively.



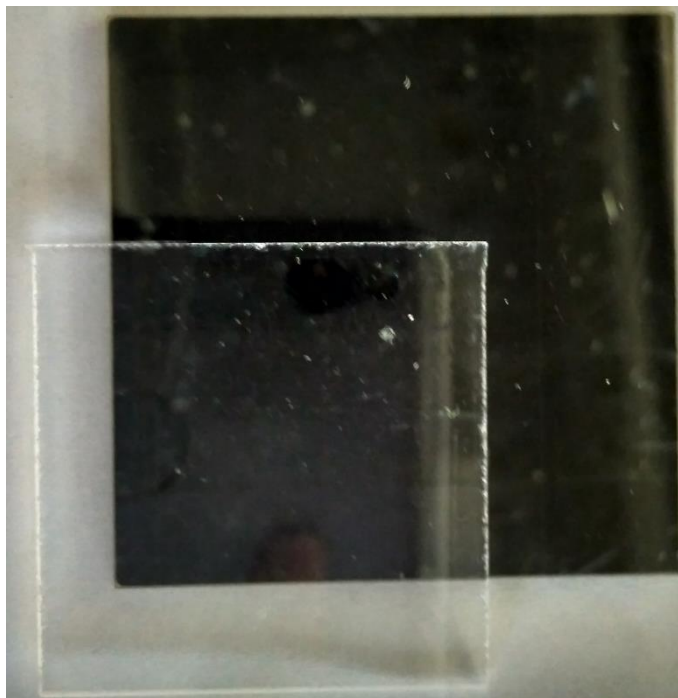

**Fig. S12** Photograph of commercial quartz plate between cross polarizers as a control.

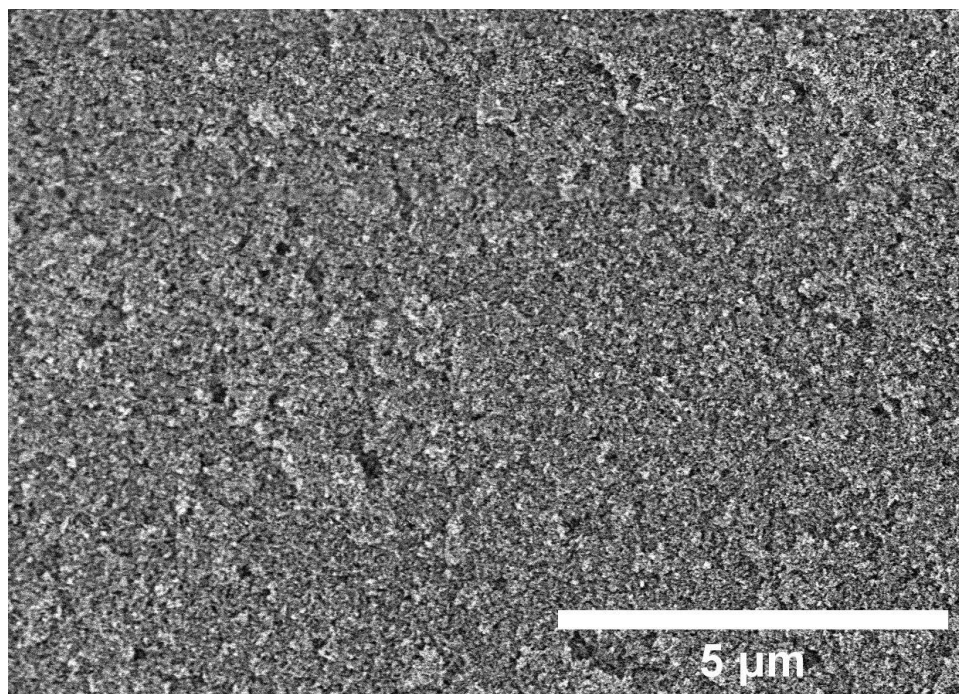

**Fig. S13** SEM image showing a cross-section of the two-step catalyzed silica aerogel ( $\text{SiO}_2\text{-B}$ , hydrolysis under acidic conditions and then condensation under basic conditions).

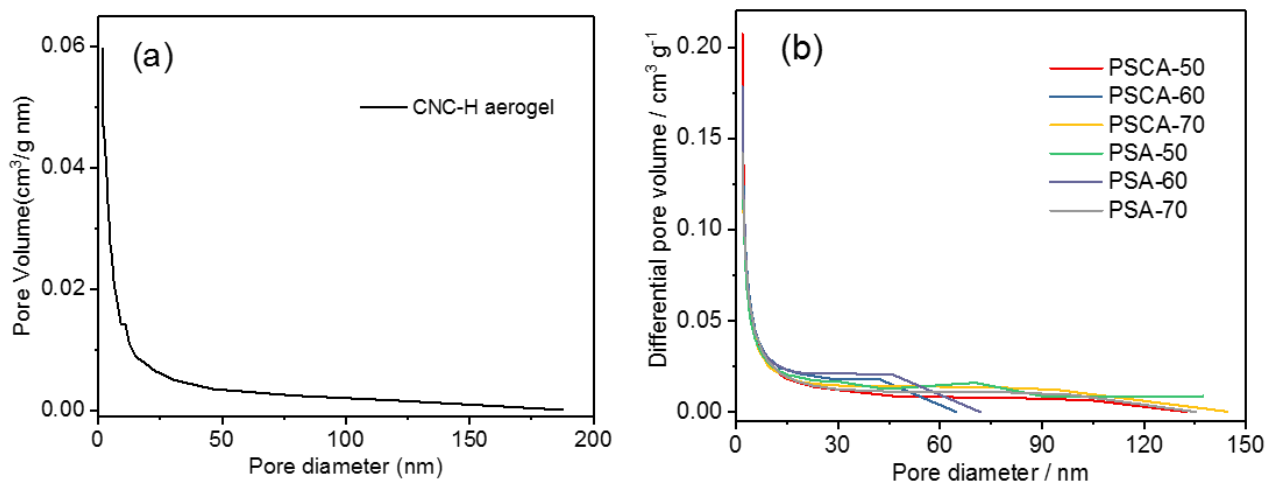

**Fig. S14** Pore size distributions of (a) CNC-H aerogel. (b) cellulose/silica and pure silica aerogel. Distributions were determined from the adsorption branch of the isotherm

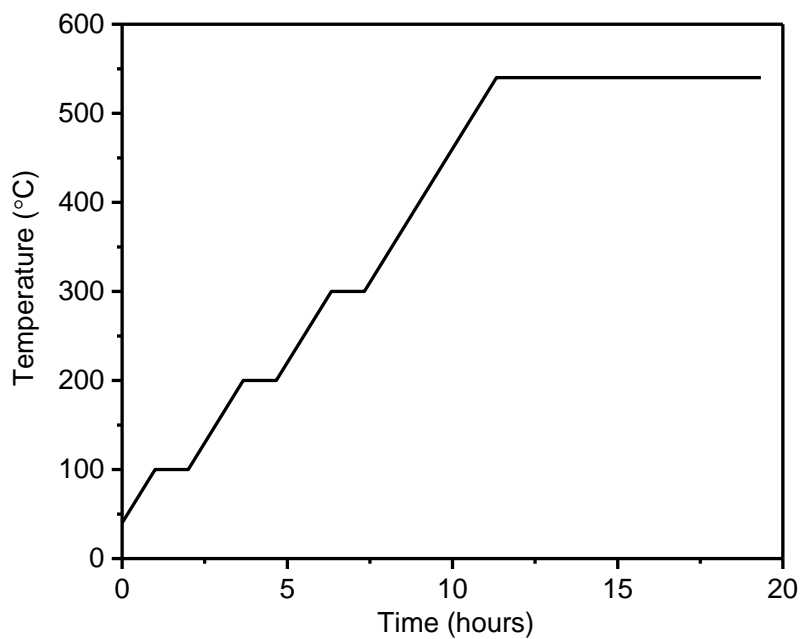

**Fig. S15** Temperature program for the calcination experiments.

**Table S2.** Pore volume for different pore size ranges

| Sample  | $V_{mi}$ (cm <sup>3</sup> g <sup>-1</sup> ) | $V_{me}$ (cm <sup>3</sup> g <sup>-1</sup> ) | $V_p$ (cm <sup>3</sup> g <sup>-1</sup> ) |  | $V_T$ (cm <sup>3</sup> g <sup>-1</sup> ) | 100 $V_{me}/V_T$ % |
|---------|---------------------------------------------|---------------------------------------------|------------------------------------------|--|------------------------------------------|--------------------|
|         |                                             |                                             | (pores between 1.7nm and 300 nm)         |  |                                          |                    |
| PCA-H   | 0.01                                        | 0.51                                        | 0.79                                     |  | 17.46                                    | 2.92               |
| PCA-Na  | 0.01                                        | 0.47                                        | 0.74                                     |  | 13.40                                    | 3.51               |
| PSCA-50 | 0.06                                        | 1.18                                        | 1.59                                     |  | 8.22                                     | 14.36              |
| PSCA-60 | 0.04                                        | 1.41                                        | 1.56                                     |  | 4.25                                     | 33.17              |
| PSCA-70 | 0.04                                        | 1.30                                        | 2.42                                     |  | 3.91                                     | 33.23              |
| PSA-50  | 0.03                                        | 1.22                                        | 2.33                                     |  | 8.17                                     | 14.93              |
| PSA-60  | 0.03                                        | 1.71                                        | 1.90                                     |  | 6.46                                     | 26.47              |
| PSA-70  | 0.02                                        | 1.89                                        | 1.89                                     |  | 6.14                                     | 30.77              |

Note: micropore volume ( $V_{mi}$ ), mesopore volume ( $V_{me}$ ), the BJH cumulative pore volume (pore between 1.7 nm and 300 nm) ( $V_p$ ) and the total pore volume ( $V_T$ ). The Calculation for the total pore volume are based on the following equation:

$$V_T = \frac{1}{\rho} - \frac{1}{\rho_{skeleton}}$$

$$\rho_{skeleton} = \frac{1}{\frac{\omega_s}{\rho_s} + \frac{\omega_c}{\rho_c}}$$
